# Supplementary material
Source: PubMed Central journal article supplement (PMC3707643)

Supplemental Figure 1

A

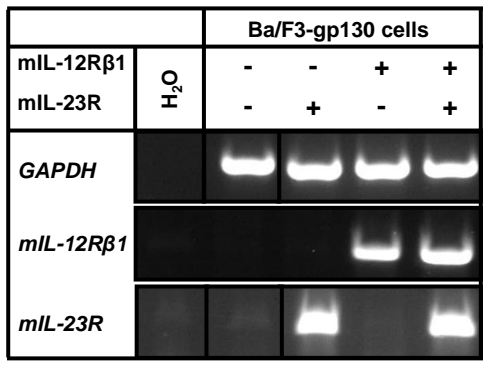

B

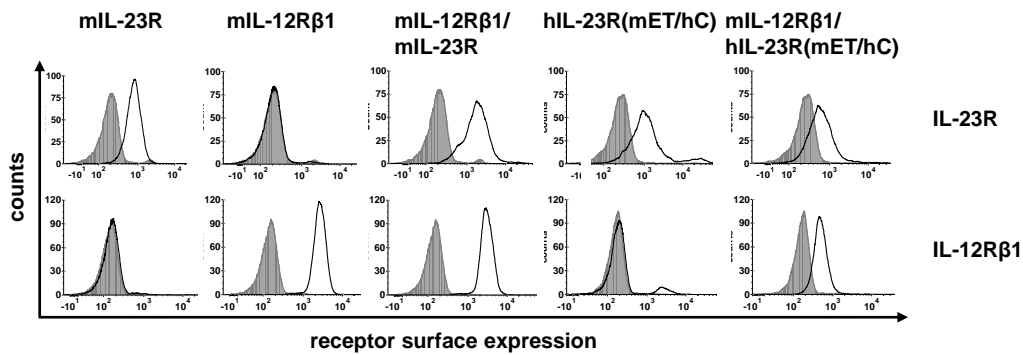

Supplemental Figure 2

**A**

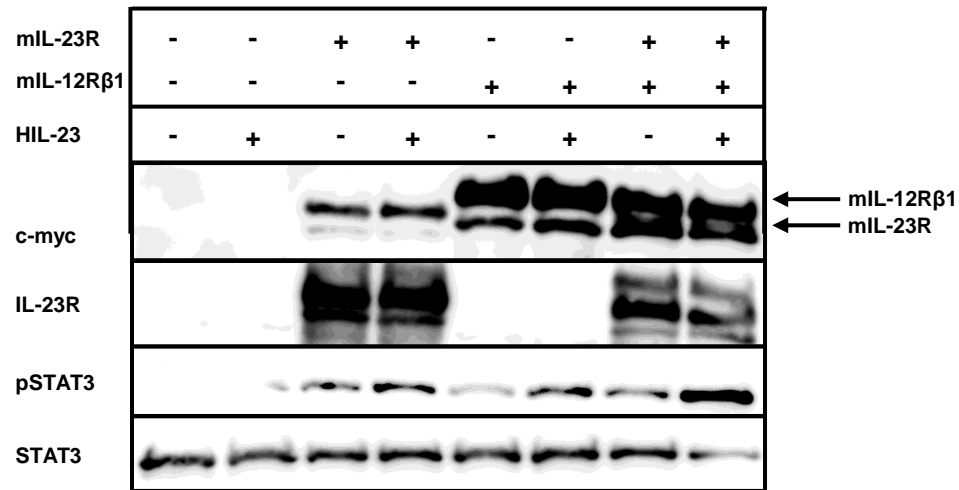

**B**

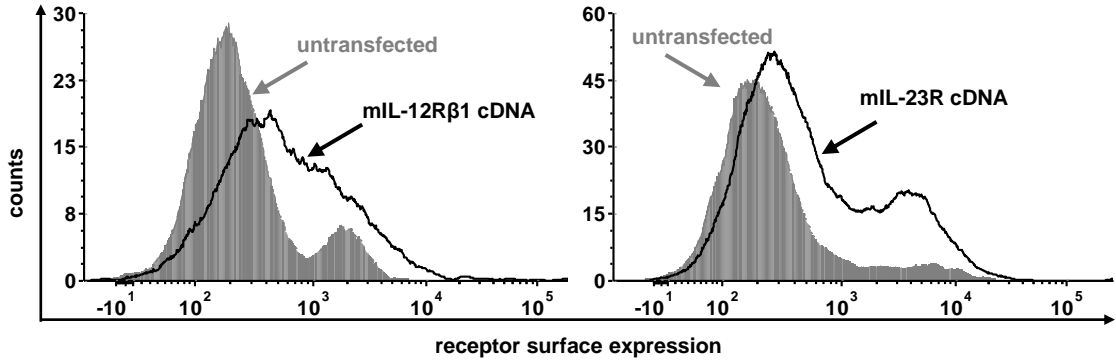

**C**

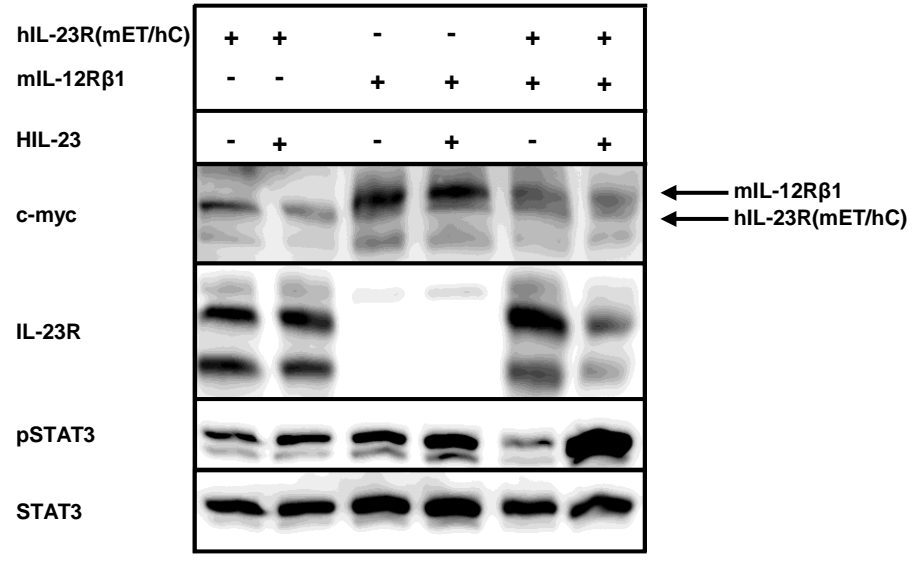

Supplemental Figure 3

A

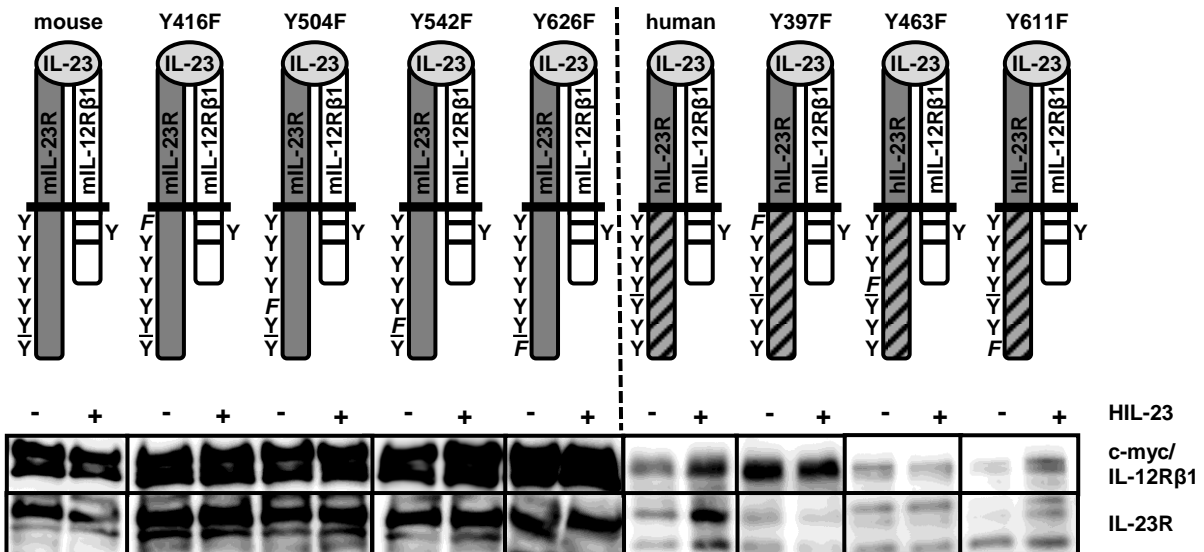

B

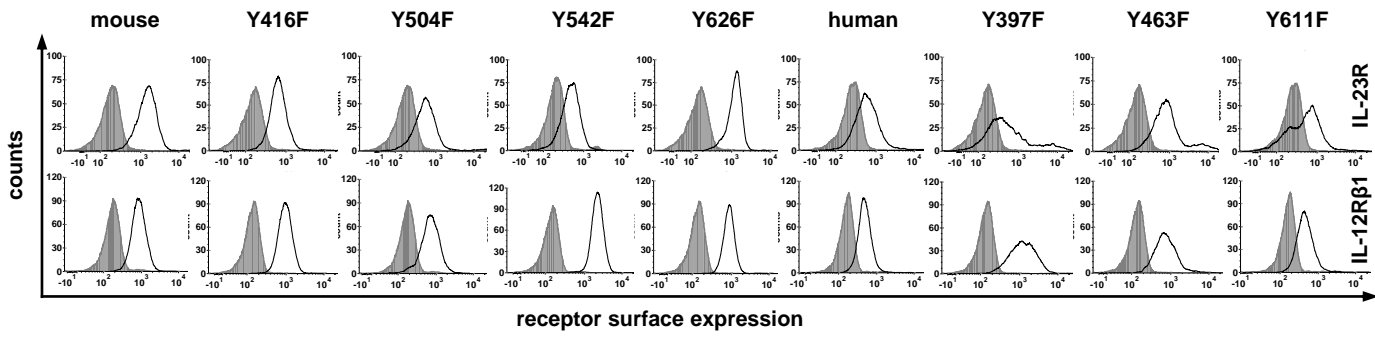

Supplemental Figure 4

**A**

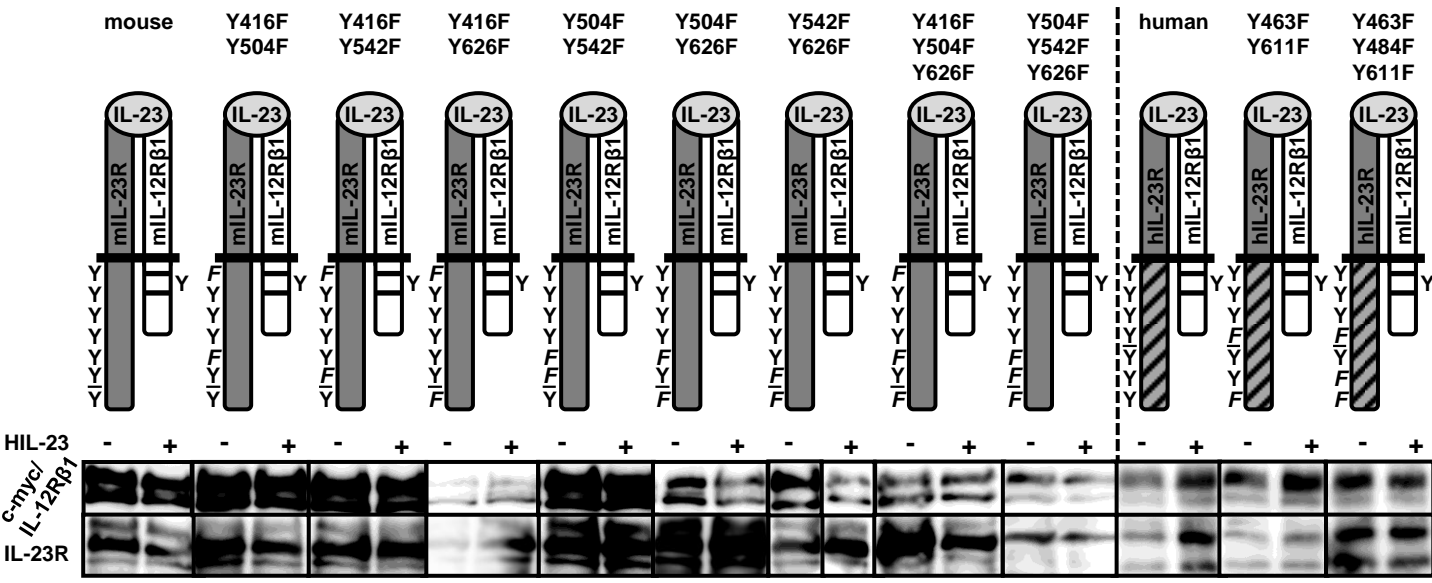

**B**

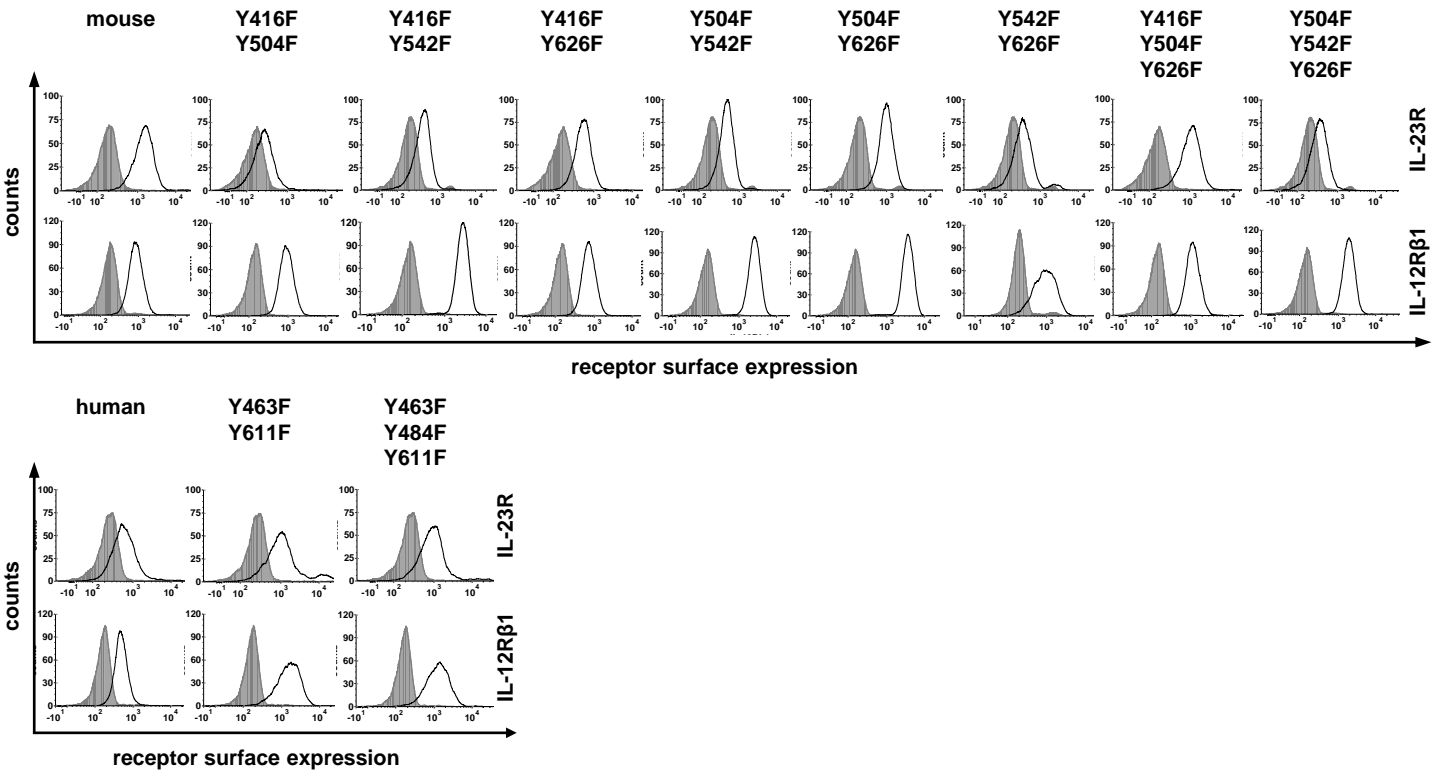

Supplemental Figure 5

A

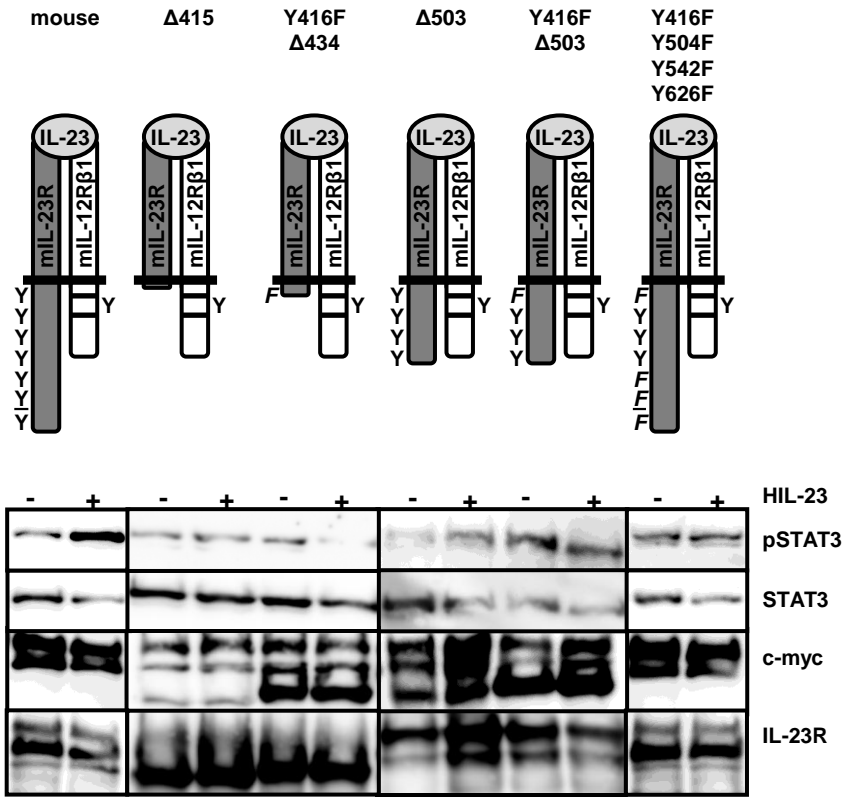

B

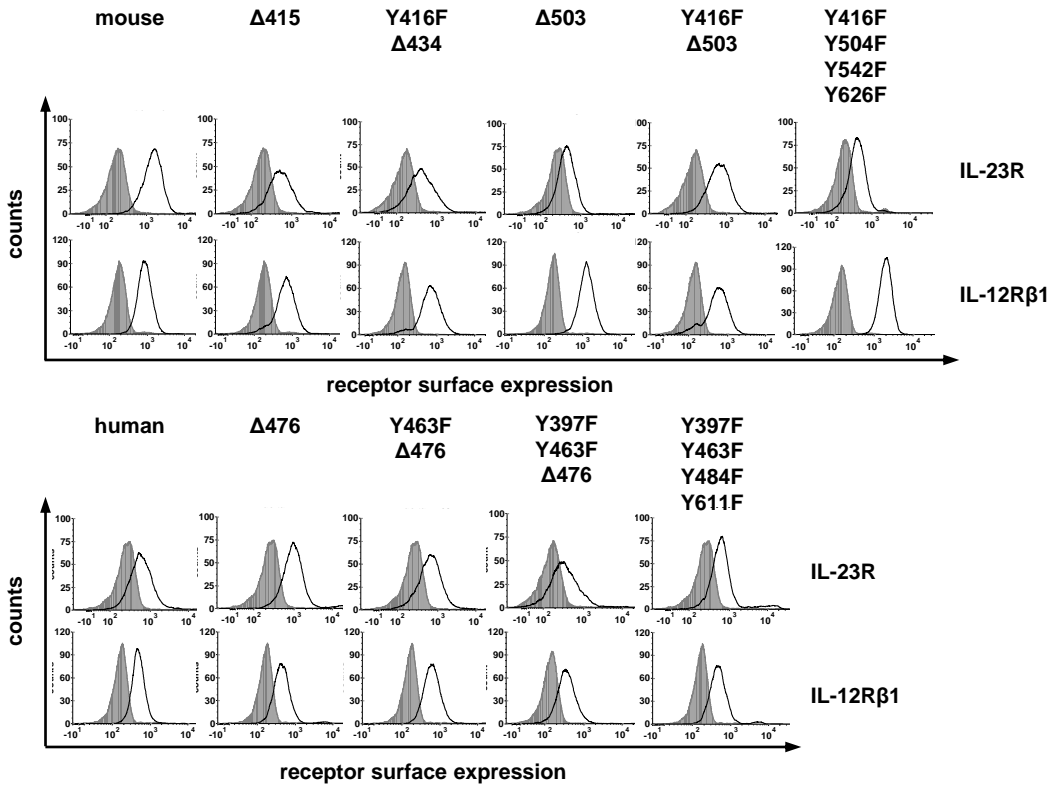

Supplemental Figure 6

**A**

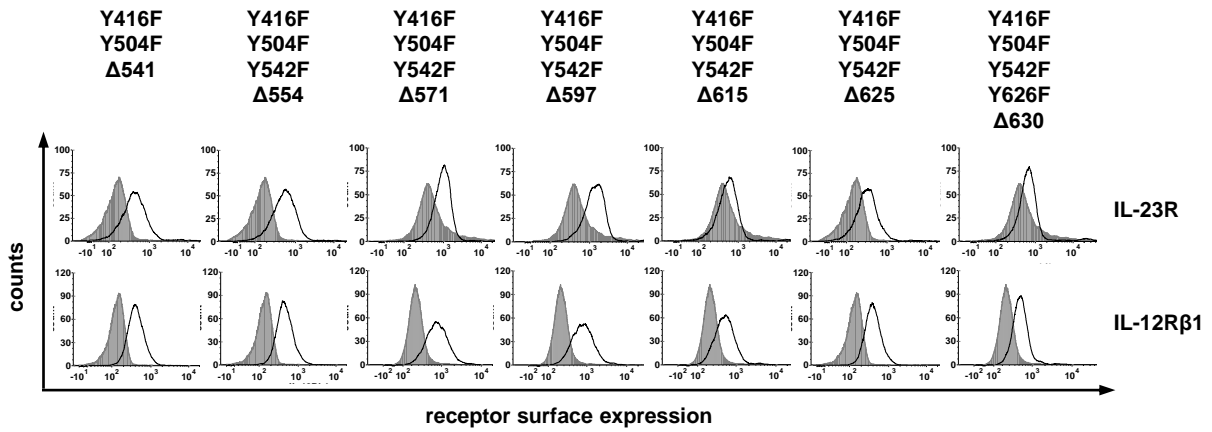

**B**

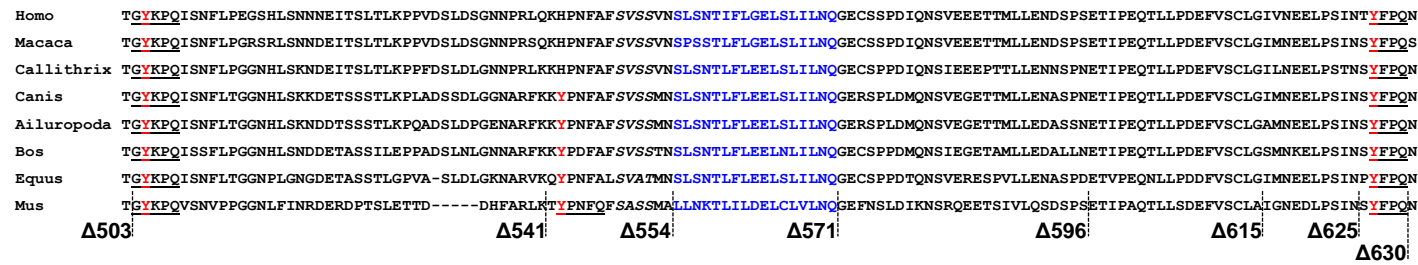

**C**

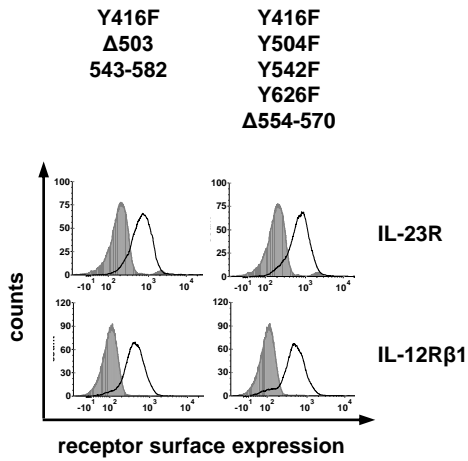

Supplement: supp_M112.432153_jbc.M112.432153-1.pdf [file supp_M112.432153_jbc.M112.432153-1.pdf]
